# Supplementary material for: Comprehensive Comparison of 22C3 and SP263 PD-L1 Expression in Non-Small-Cell Lung Cancer Using Routine Clinical and Conditioned Archives
Source: MDPI journal article supplement (doi:10.3390/cancers14133138), 2022-06-27
Supplement: s1 [file s1]

Table S1: Clinicopathologic characteristics  
of 314 FFPE archives

|                         | No. of Patient (%) |        |
|-------------------------|--------------------|--------|
| Age                     |                    |        |
| Range                   | 46 - 80            |        |
| Median                  | 66                 |        |
| Gender                  |                    |        |
| Male                    | 169                | (53.8) |
| Female                  | 145                | (46.2) |
| Smoking                 |                    |        |
| Non-smoker              | 134                | (42.7) |
| Smoker                  | 180                | (57.3) |
| Tumor size (cm)         |                    |        |
| 3                       | 144                | (45.9) |
| >3                      | 170                | (54.1) |
| Tumor Type              |                    |        |
| Adenocarcinoma          | 210                | (66.8) |
| Squamous cell carcinoma | 104                | (33.2) |
| T classification        |                    |        |
| T1                      | 105                | (33.4) |
| T2                      | 170                | (54.1) |
| T3                      | 39                 | (12.5) |
| Stage                   |                    |        |
| I                       | 103                | (32.8) |
| II                      | 165                | (52.5) |
| III                     | 46                 | (14.7) |
| Surgical procedure      |                    |        |
| Lobectomy               | 75                 | (94.4) |
| Pneumonectomy           | 4                  | (5.6)  |

FFPE, formalin-fixed paraffin-embedded
